# Supplementary material for: Deep Learning-Based Identification of Intraocular Pressure-Associated Genes Influencing Trabecular Meshwork Cell Morphology
Source: PubMed Central journal article supplement (PMC11046128; doi:10.1016/j.xops.2024.100504), 2024-03-05
Supplement: mmc1.pdf [file mmc1.pdf]

**Code availability**

The Python functions utilised for data preparation, CNN training and evaluation are available on

GitHub: [https://github.com/ConnorG1/TMC\\_CNN](https://github.com/ConnorG1/TMC_CNN)

**Data availability**

Data is available at the European Bioimage Institute Bioimage Archive: Accession S-BSST841
