# Supplementary material for: Deep Learning-Based Identification of Intraocular Pressure-Associated Genes Influencing Trabecular Meshwork Cell Morphology
Source: PubMed Central journal article supplement (PMC11046128; doi:10.1016/j.xops.2024.100504), 2024-03-05

## SUPPLEMENTARY DETAILS

**Supplementary Figure 1:** Characterization of primary TMCs. A) Immunostaining of CAV1 (cat.3238S, Cell Signalling); B) Immunostaining of TIMP3 (cat.ab39184, Abcam); C) Phagocytosis assay using pHrodo bioparticles (Red) (cat.A10010, ThermoFisher Scientific); D) Immunostaining of MYOC (PAH586Hu01, Cloud-Clone Corp.) without dexamethasone treatment; E) Immunostaining of myocilin (PAH586Hu01, Cloud-Clone Corp.) following dexamethasone exposure; F) Relative expression of MYOC with or without exposure to dexamethasone (normalized to EEF2 expression). Significant results are defined as \* $p < 0.05$ ; \*\* $p < 0.01$ ; \*\*\* $p < 0.001$ , and \*\*\*\* $p < 0.0001$ . Scale bar: 20  $\mu\text{m}$ .

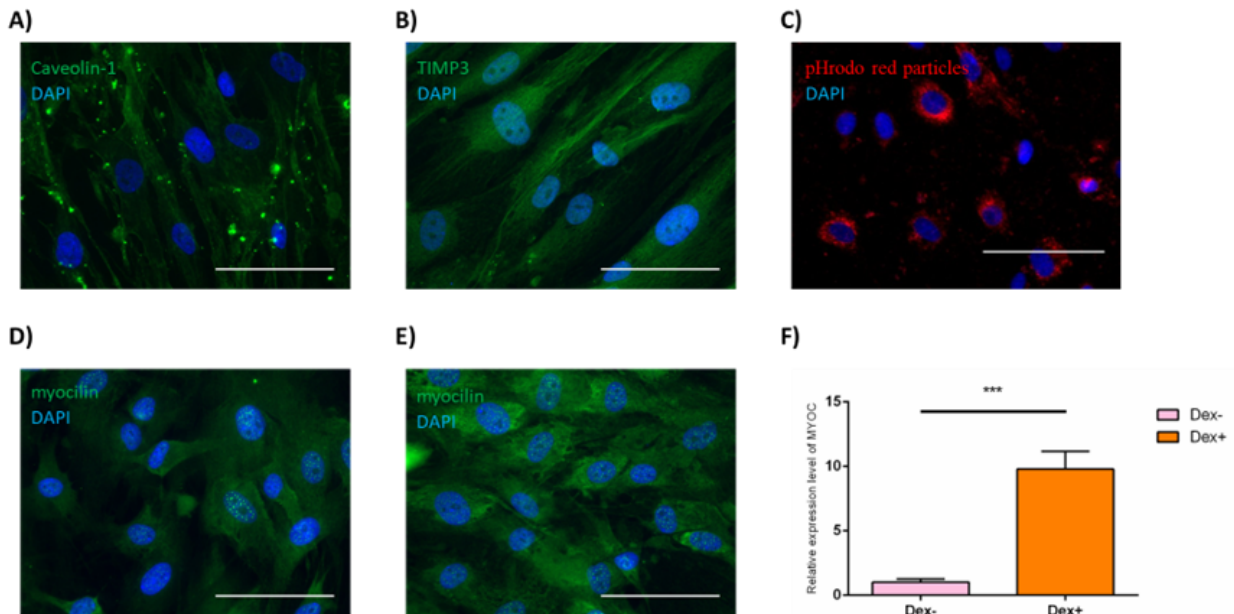

Supplement: mmc2.pdf [file mmc2.pdf]
