# Supplementary material for: Deep Learning-Based Identification of Intraocular Pressure-Associated Genes Influencing Trabecular Meshwork Cell Morphology
Source: PubMed Central journal article supplement (PMC11046128; doi:10.1016/j.xops.2024.100504), 2024-03-05

**Supplementary Figure 2:** Comparison of gene expression levels between each target knockout cell line and non-targeting control cells. ABO and TEX41 were found not to be expressed in our TMCs. P-values are displayed from the Student t-test.

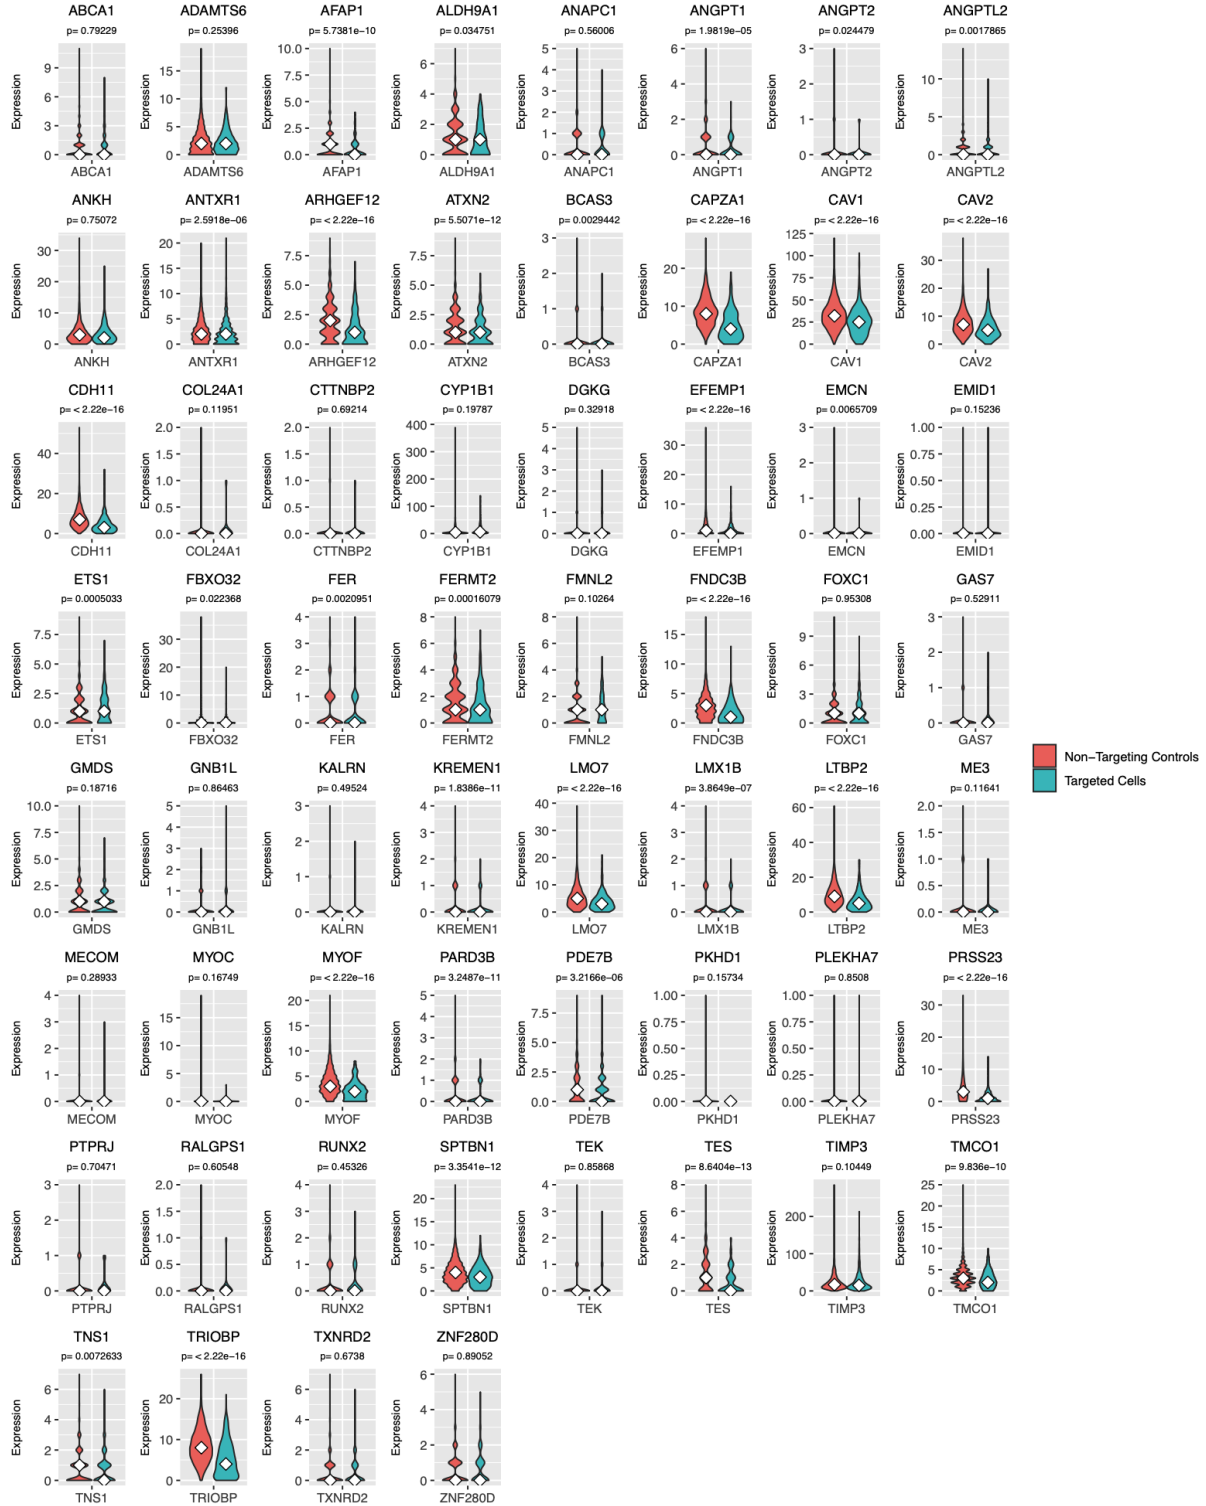

Supplement: mmc3.pdf [file mmc3.pdf]
