# Supplementary material for: Deep Learning-Based Identification of Intraocular Pressure-Associated Genes Influencing Trabecular Meshwork Cell Morphology
Source: PubMed Central journal article supplement (PMC11046128; doi:10.1016/j.xops.2024.100504), 2024-03-05
Supplement: mmc4.pdf [file mmc4.pdf]

**Supplementary table 1**

| sgRNA name   | Sequence             | Gene            | Exon | Protein domain targeted | Predicted On-target efficiency |
|--------------|----------------------|-----------------|------|-------------------------|--------------------------------|
| GUIDES_sg001 | GTTGACTGGGAGAGAACACG | <i>ABCA1</i>    | 46   | ABC_tran                | 0.707186352                    |
| GUIDES_sg002 | GTGTTCTAAAAGAGAAACAC | <i>ABCA1</i>    | 50   | -                       | 0.684107302                    |
| GUIDES_sg003 | GTGCAGTGTCTCTCCTACAC | <i>ADAMTS6</i>  | 28   | -                       | 0.720054847                    |
| GUIDES_sg004 | ACCAGTCATGTCCACCACAG | <i>ADAMTS6</i>  | 26   | -                       | 0.71972146                     |
| GUIDES_sg005 | CAAGGGTAAAAAGCCCCCG  | <i>AFAP1</i>    | 16   | -                       | 0.759587174                    |
| GUIDES_sg006 | GGAAAGAAAAGACCTTCGAG | <i>AFAP1</i>    | 17   | -                       | 0.753862205                    |
| GUIDES_sg007 | CAACTATAACGTGAGCCAG  | <i>ALDH9A1</i>  | 10   | Aldedh                  | 0.764185557                    |
| GUIDES_sg008 | TATGAACAATGCTGTAAAGG | <i>ALDH9A1</i>  | 6    | Aldedh                  | 0.704113168                    |
| GUIDES_sg009 | GTGCTGTGAGCTGGGAAGTG | <i>ANAPC1</i>   | 39   | -                       | 0.69840945                     |
| GUIDES_sg010 | ATGGCTCTTCCTGTAGGACG | <i>ANAPC1</i>   | 27   | -                       | 0.641611628                    |
| GUIDES_sg011 | CCCCAGCCAATATTCACCGG | <i>ANGPT1</i>   | 9    | Fibrinogen_C            | 0.666179972                    |
| GUIDES_sg012 | AATATGGATGTCAATGGGGG | <i>ANGPT1</i>   | 8    | Fibrinogen_C            | 0.630390739                    |
| GUIDES_sg013 | TAACGTGTAGATGCCATTCG | <i>ANGPT2</i>   | 5    | Fibrinogen_C            | 0.692502215                    |
| GUIDES_sg014 | TGTGACATGGAAGCTGGAGG | <i>ANGPT2</i>   | 6    | Fibrinogen_C            | 0.647042655                    |
| GUIDES_sg015 | ACTCGCTCTCAGGTTCCAGG | <i>ANGPTL2</i>  | 5    | Fibrinogen_C            | 0.761119961                    |
| GUIDES_sg016 | CACCAGCATGTCACGCACAG | <i>ANGPTL2</i>  | 2    | RasGEF                  | 0.753686491                    |
| GUIDES_sg017 | CTTTGTGGGAGAATCCACCA | <i>ANKH</i>     | 14   | ANKH                    | 0.705623542                    |
| GUIDES_sg018 | TGAGGGCGCATCTCACCGGG | <i>ANKH</i>     | 13   | ANKH                    | 0.671178514                    |
| GUIDES_sg019 | CTTCGACATGCCCGCAACG  | <i>ANTXR1</i>   | 10   | Anth_lg                 | 0.66965417                     |
| GUIDES_sg020 | CAGAACTGGAGATAAAAGAG | <i>ANTXR1</i>   | 12   | Anth_lg                 | 0.661995855                    |
| GUIDES_sg021 | CTGCTGGACCAGAAATTCGG | <i>ARHGEF12</i> | 39   | -                       | 0.715629912                    |
| GUIDES_sg022 | TCTCTGGGGTCATAATCATG | <i>ARHGEF12</i> | 38   | -                       | 0.682338139                    |
| GUIDES_sg023 | TACCAAATATGCCCAACAG  | <i>ATXN2</i>    | 21   | -                       | 0.746394842                    |
| GUIDES_sg024 | ATTACAGGACTATAGACATG | <i>ATXN2</i>    | 22   | -                       | 0.705381212                    |
| GUIDES_sg025 | ATGGGCCAGGACTTCCAGG  | <i>BCAS3</i>    | 35   | -                       | 0.763805308                    |
| GUIDES_sg026 | TGAACTGGATGAGATAACTG | <i>BCAS3</i>    | 36   | -                       | 0.749363581                    |
| GUIDES_sg027 | AGTTTTTAGGCTGAAACTGG | <i>CAPZA1</i>   | 6    | F-actin_cap_A           | 0.671121892                    |
| GUIDES_sg028 | GGAATAATGGTCTTTCACAT | <i>CAPZA1</i>   | 5    | F-actin_cap_A           | 0.61837895                     |
| GUIDES_sg029 | TAAACACCTCAACGATGACG | <i>CAV1</i>     | 3    | Caveolin                | 0.697766064                    |
| GUIDES_sg030 | TGGGGGCAAATACGTAGACT | <i>CAV1</i>     | 1    | Caveolin                | 0.638532867                    |
| GUIDES_sg031 | GATGTGCAGACAGCTGAGGG | <i>CAV2</i>     | 23   | Caveolin                | 0.699222046                    |
| GUIDES_sg032 | CGGCGTACTCGAGGCCGCTG | <i>CAV2</i>     | 22   | Caveolin                | 0.674769146                    |
| GUIDES_sg033 | TCAGGAAGCCAAAGTCCCAG | <i>CDH11</i>    | 19   | Cadherin                | 0.765145054                    |
| GUIDES_sg034 | GGATTGTGAATGATTCAGG  | <i>CDH11</i>    | 20   | Cadherin                | 0.686839641                    |
| GUIDES_sg035 | GGGTTATCTCGTGTGCCAAG | <i>COL24A1</i>  | 60   | COLFI                   | 0.662833491                    |
| GUIDES_sg036 | GAAATTGCAGAAAACCTCAA | <i>COL24A1</i>  | 61   | COLFI                   | 0.614109727                    |
| GUIDES_sg037 | AAGCGGCCAGACTTCTGCG  | <i>CTTNBP2</i>  | 25   | -                       | 0.737788504                    |
| GUIDES_sg038 | GCCAGGTTGTCTTTTCACAG | <i>CTTNBP2</i>  | 24   | -                       | 0.682279464                    |
| GUIDES_sg039 | AACATTCCCAGCATGTACGG | <i>DGKG</i>     | 22   | DAGK_acc                | 0.746132205                    |
| GUIDES_sg040 | GTACTTTGAATTTGGCACCT | <i>DGKG</i>     | 21   | DAGK_acc                | 0.610555363                    |
| GUIDES_sg041 | GACCACAAATGAATGCCGGG | <i>EFEMP1</i>   | 9    | EGF_CA                  | 0.7383367                      |

|              |                       |                |    |           |             |
|--------------|-----------------------|----------------|----|-----------|-------------|
| GUIDES_sg042 | TCACCACTTGGTATCCCTGG  | <i>EFEMP1</i>  | 8  | EGF_CA    | 0.711733541 |
| GUIDES_sg043 | ACGCTCTCTTTATCAGACTG  | <i>EMCN</i>    | 19 | Endomucin | 0.716120299 |
| GUIDES_sg044 | GTTTTAGAAGGTGATGCATC  | <i>EMCN</i>    | 15 | Endomucin | 0.500046723 |
| GUIDES_sg045 | AGGACTCCCAGGGACACCTG  | <i>EMID1</i>   | 11 | Collagen  | 0.633805274 |
| GUIDES_sg046 | GCTGCCCAGCAGACCTTGG   | <i>EMID1</i>   | 13 | Collagen  | 0.50154336  |
| GUIDES_sg047 | GCAGTGGACCAATCCAGCTA  | <i>ETS1</i>    | 13 | Ets       | 0.590477455 |
| GUIDES_sg048 | CACTAAAGAACAGCAACGAC  | <i>ETS1</i>    | 8  | SAM_PNT   | 0.507782957 |
| GUIDES_sg049 | ATGTTTCAGTTGTAGGCACAA | <i>FBXO32</i>  | 7  | -         | 0.680491123 |
| GUIDES_sg050 | AACTTGTCGGATGTACCCA   | <i>FBXO32</i>  | 8  | -         | 0.665922839 |
| GUIDES_sg051 | ACAGTTCAGAGAGTGACGTG  | <i>FER</i>     | 26 | Pkinase   | 0.744231001 |
| GUIDES_sg052 | ATGTCTCGTCAAGAGGATGG  | <i>FER</i>     | 25 | Pkinase   | 0.666176654 |
| GUIDES_sg053 | GCCTGCAGATTAGCCTCAA   | <i>FERMT2</i>  | 17 | PH        | 0.635135622 |
| GUIDES_sg054 | CTGAGGTTTCATCTGATGAGC | <i>FERMT2</i>  | 15 | PH        | 0.496718402 |
| GUIDES_sg055 | GGAGTTCATCCTCAACAATG  | <i>FMNL2</i>   | 23 | FH2       | 0.656016612 |
| GUIDES_sg056 | TTCACAAACCGGACAAAGAC  | <i>FMNL2</i>   | 24 | FH2       | 0.52306371  |
| GUIDES_sg057 | TGTGTACACACTACAGCTGG  | <i>FNDC3B</i>  | 31 | fn3       | 0.726749897 |
| GUIDES_sg058 | GCTCTCCCAGTTCAGTACA   | <i>FNDC3B</i>  | 30 | fn3       | 0.69274705  |
| GUIDES_sg059 | GCTGAGCAACAAGACAGAGG  | <i>GAS7</i>    | 19 | -         | 0.715444147 |
| GUIDES_sg060 | GCTTGCGAAGGTCGGCAATG  | <i>GAS7</i>    | 18 | -         | 0.692490099 |
| GUIDES_sg061 | GCCCACACTCTCCAAGCACA  | <i>GNB1L</i>   | 3  | -         | 0.656080017 |
| GUIDES_sg062 | GCAGGCTCCAGATGTGTACC  | <i>GNB1L</i>   | 2  | WD40      | 0.572759585 |
| GUIDES_sg063 | TGAACAGAGAGACTTCTGAG  | <i>KALRN</i>   | 59 | PH        | 0.713929927 |
| GUIDES_sg064 | CTTCCTGAGATACAGTGAGA  | <i>KALRN</i>   | 56 | RhoGEF    | 0.590046749 |
| GUIDES_sg065 | TGATTACTGGAAGTACGGGG  | <i>KREMEN1</i> | 5  | WSC       | 0.732200895 |
| GUIDES_sg066 | TTACTGGTGCCAGTTAGAGG  | <i>KREMEN1</i> | 4  | WSC       | 0.660612633 |
| GUIDES_sg067 | CAGGGACTCGATGATCATGG  | <i>LMO7</i>    | 34 | LIM       | 0.767439497 |
| GUIDES_sg068 | GATCCTGACTTCAGCTCCTG  | <i>LMO7</i>    | 35 | LIM       | 0.666458078 |
| GUIDES_sg069 | CTTCGACGAGACCTCGAAGG  | <i>LMX1B</i>   | 4  | Homeobox  | 0.713403988 |
| GUIDES_sg070 | GTGCAAGGGTGACTACGAGA  | <i>LMX1B</i>   | 3  | LIM       | 0.675803927 |
| GUIDES_sg071 | ACGTCTCGGATGGTGCTGAG  | <i>ME3</i>     | 18 | Malic_M   | 0.711900963 |
| GUIDES_sg072 | AGAGAAAGAAGGTGTACCGA  | <i>ME3</i>     | 14 | Malic_M   | 0.683948993 |
| GUIDES_sg073 | TAGTACTTCCCATGTGCCAG  | <i>MECOM</i>   | 24 | -         | 0.69054325  |
| GUIDES_sg074 | ACTGTGGCAAGATTTTCCA   | <i>MECOM</i>   | 20 | zf-C2H2   | 0.638498746 |
| GUIDES_sg075 | GGACTTCTGCTCAAAGAGGG  | <i>MYOF</i>    | 56 | -         | 0.689398449 |
| GUIDES_sg076 | TGCATGGGTTGGTGAACCAG  | <i>MYOF</i>    | 58 | -         | 0.68114604  |
| GUIDES_sg077 | AAAGGTA CTCTGAAACATGG | <i>PARD3B</i>  | 24 | -         | 0.748915706 |
| GUIDES_sg078 | TGGTCTCTTTCTGGAGACAG  | <i>PARD3B</i>  | 25 | -         | 0.687131379 |
| GUIDES_sg079 | TCTGGGAGATGAGCAAGCAG  | <i>PDE7B</i>   | 11 | PDEase_I  | 0.63710316  |
| GUIDES_sg080 | TCTTTCTGTTGATTACAAAG  | <i>PDE7B</i>   | 12 | PDEase_I  | 0.626787508 |
| GUIDES_sg081 | CGTGAGACTCCAGTCACAGG  | <i>PKHD1</i>   | 20 | -         | 0.721146822 |
| GUIDES_sg082 | ATGGGATAGCCCCAAGCAGG  | <i>PKHD1</i>   | 16 | -         | 0.648027027 |
| GUIDES_sg083 | TACTCAGGGGATCACCAGCG  | <i>PLEKHA7</i> | 28 | -         | 0.733493753 |
| GUIDES_sg084 | CCCCGA ACTCTACAGCCAG  | <i>PLEKHA7</i> | 25 | -         | 0.727012157 |
| GUIDES_sg085 | GCTGCCCACTGCATACACGA  | <i>PRSS23</i>  | 3  | Trypsin   | 0.707785666 |

|                         |                        |                |    |               |             |
|-------------------------|------------------------|----------------|----|---------------|-------------|
| GUIDES_sg086            | AACATCAGTGAAGTTATCCA   | <i>PRSS23</i>  | 3  | Trypsin       | 0.589826381 |
| GUIDES_sg087            | CAGTGGTGTCTGGGAACACCG  | <i>PTPRJ</i>   | 26 | Y_phosphatase | 0.752294442 |
| GUIDES_sg088            | GTTTCGGTAAAGGTCCTTG TG | <i>PTPRJ</i>   | 24 | Y_phosphatase | 0.742428198 |
| GUIDES_sg089            | TGGCAAAAAGGTTTCCATCG   | <i>RALGPS1</i> | 25 | PH            | 0.63983389  |
| GUIDES_sg090            | CGAAAGAAGATAATTACAAG   | <i>RALGPS1</i> | 11 | RasGEF        | 0.632295378 |
| GUIDES_sg091            | AGAGGTACCAGATGGGACTG   | <i>RUNX2</i>   | 5  | Runt          | 0.707376125 |
| GUIDES_sg092            | CATGGCGGAAGCATTCTGGA   | <i>RUNX2</i>   | 11 | Runx1         | 0.681198759 |
| GUIDES_sg093            | TGGAATTCCTACCACAGCG    | <i>SPTBN1</i>  | 36 | PH            | 0.712246448 |
| GUIDES_sg094            | TCAGTCTTAACCATTCCCAT   | <i>SPTBN1</i>  | 31 | Spectrin      | 0.683179693 |
| GUIDES_sg095            | GGGCTGGCTATGATAAACTG   | <i>TES</i>     | 6  | LIM           | 0.774116567 |
| GUIDES_sg096            | CCATGAGTTGTCTCCAGAG    | <i>TES</i>     | 5  | PET           | 0.735126362 |
| GUIDES_sg097            | GAAGCTCCGAGAGTCTCTG    | <i>TIMP3</i>   | 3  | TIMP          | 0.703685264 |
| GUIDES_sg098            | CTATGATGGCAAGATGTACA   | <i>TIMP3</i>   | 4  | TIMP          | 0.591387438 |
| GUIDES_sg099            | AGTCCTTGATGTAAGAAAG    | <i>TMCO1</i>   | 9  | DUF841        | 0.652850785 |
| GUIDES_sg100            | GAAACAATAACAGAGTCAGC   | <i>TMCO1</i>   | 5  | DUF841        | 0.622258097 |
| GUIDES_sg101            | AGAGACTTTGAAGTGAACGA   | <i>TNS1</i>    | 42 | PTB           | 0.715095311 |
| GUIDES_sg102            | CAGAAGGTGACAGTGTGAG    | <i>TNS1</i>    | 43 | PTB           | 0.675343539 |
| GUIDES_sg103            | GCCGACTGGTGACCTCATGG   | <i>TRIOBP</i>  | 3  | -             | 0.713915639 |
| GUIDES_sg104            | GGGAGCAGGAGGCAGGAACG   | <i>TRIOBP</i>  | 4  | -             | 0.656603289 |
| GUIDES_sg105            | TAAACCACTGGAGTTCACGG   | <i>TXNRD2</i>  | 20 | Pyr_redox_dim | 0.785275668 |
| GUIDES_sg106            | TCATCATTGCTACTGGAGGG   | <i>TXNRD2</i>  | 8  | Pyr_redox_2   | 0.706088692 |
| GUIDES_sg107            | GGTGAAGCTCCTGATTGCAG   | <i>ZNF280D</i> | 27 | -             | 0.700021186 |
| GUIDES_sg108            | GAAGAAAGTAAAGAAGTTG    | <i>ZNF280D</i> | 15 | -             | 0.599965492 |
| GUIDES_sg109            | ATGGAGTTCCGCGACCACGT   | <i>ABO</i>     | 7  | CDS           | 0.6563      |
| GUIDES_sg110            | CCGGTCCCCAGCGTCACGCG   | <i>ABO</i>     | 7  | CDS           | 0.6687      |
| GUIDES_sg111            | CCACCTGGTACATCGCCTCA   | <i>TEX41</i>   | 2  | TRANSCRIPT    | 0.6631      |
| GUIDES_sg112            | AACTCAAGACATTGGAACCA   | <i>TEX41</i>   | 5  | TRANSCRIPT    | 0.6251      |
| GUIDES_sg113            | AATGTGGTAGCCCAAGACAG   | <i>CYP1B1</i>  | 5  | p450          | 0.775320729 |
| GUIDES_sg114            | GTGGCCACTGATCGGAAACG   | <i>CYP1B1</i>  | 3  | p450          | 0.726256031 |
| GUIDES_sg115            | GCAAGCCATGAGCCTGTACG   | <i>FOXC1</i>   | 1  | -             | 0.747984594 |
| GUIDES_sg116            | TCGTCGTCCCTGAGTCACGG   | <i>FOXC1</i>   | 1  | -             | 0.730741126 |
| GUIDES_sg117            | GATTGTGGTGAACCTCCGTG   | <i>GMDS</i>    | 8  | Epimerase     | 0.727535334 |
| GUIDES_sg118            | GTTGCAGAATGATGAGCCGG   | <i>GMDS</i>    | 10 | Epimerase     | 0.65599947  |
| GUIDES_sg119            | CCTCCCGCACGCGCACACAG   | <i>LTBP2</i>   | 35 | EGF           | 0.755863507 |
| GUIDES_sg120            | CAGGCAGACATAACCAGGCA   | <i>LTBP2</i>   | 31 | EGF_CA        | 0.708717    |
| GUIDES_sg121            | GGTCATACTCAAAAACCTGG   | <i>MYOC</i>    | 3  | OLF           | 0.763937898 |
| GUIDES_sg122            | ATGCCAGTATACCTTCAGTG   | <i>MYOC</i>    | 1  | -             | 0.722928246 |
| GUIDES_sg123            | TCTTGCGAAGGAAGTCCAGA   | <i>TEK</i>     | 17 | Pkinase       | 0.627785812 |
| GUIDES_sg124            | ATCTAATGAGACAATGCTGG   | <i>TEK</i>     | 22 | Pkinase       | 0.626682424 |
| NonTargeting Human_0001 | ACGGAGGCTAAGCGTCGCAA   | -              | -  | -             | -           |
| NonTargeting Human_0002 | CGCTTCCGCGGCCCGTTCAA   | -              | -  | -             | -           |
| NonTargeting Human_0003 | ATCGTTTCCGCTTAACGGCG   | -              | -  | -             | -           |

|                            |                       |   |   |   |   |
|----------------------------|-----------------------|---|---|---|---|
| NonTargeting<br>Human_0004 | GTAGGCGCGCCGCTCTCTAC  | - | - | - | - |
| NonTargeting<br>Human_0005 | CCATATCGGGGCGAGACATG  | - | - | - | - |
| NonTargeting<br>Human_0006 | TACTAACGCCGCTCCTACAG  | - | - | - | - |
| NonTargeting<br>Human_0007 | TGAGGATCATGTCGAGCGCC  | - | - | - | - |
| NonTargeting<br>Human_0008 | GGGCCCCGCATAGGATATCGC | - | - | - | - |
| NonTargeting<br>Human_0009 | TAGACAACCGCGGAGAATGC  | - | - | - | - |
| NonTargeting<br>Human_0010 | ACGGGCGGCTATCGCTGACT  |   |   |   |   |
