# Supplementary material for: Deep Learning-Based Identification of Intraocular Pressure-Associated Genes Influencing Trabecular Meshwork Cell Morphology
Source: PubMed Central journal article supplement (PMC11046128; doi:10.1016/j.xops.2024.100504), 2024-03-05
Supplement: mmc5.pdf [file mmc5.pdf]

**Supplementary table 2 - Tensorflow CNN architecture**

| Layer                          | Output shape        | Trainable parameters |
|--------------------------------|---------------------|----------------------|
| conv2d (Conv2D)                | (None, 54, 54, 96)  | 34,944               |
| activation (relu)              | (None, 54, 54, 96)  | 0                    |
| max_pooling2d (MaxPooling2D)   | (None, 27, 27, 96)  | 0                    |
| conv2d_1 (Conv2D)              | (None, 17, 17, 256) | 2,973,952            |
| activation_1 (relu)            | (None, 17, 17, 256) | 0                    |
| max_pooling2d_1 (MaxPooling2D) | (None, 8, 8, 256)   | 0                    |
| conv2d_2 (Conv2D)              | (None, 6, 6, 384)   | 885,120              |
| activation_2 (relu)            | (None, 6, 6, 384)   | 0                    |
| conv2d_3 (Conv2D)              | (None, 4, 4, 384)   | 1,327,488            |
| activation_3 (relu)            | (None, 4, 4, 384)   | 0                    |
| conv2d_4 (Conv2D)              | (None, 2, 2, 256)   | 884,992              |
| activation_4 (relu)            | (None, 2, 2, 256)   | 0                    |
| max_pooling2d_2 (MaxPooling2D) | (None, 1, 1, 256)   | 0                    |
| flatten (Flatten)              | (None, 256)         | 0                    |
| dense (Dense)                  | (None, 4096)        | 1,052,672            |
| activation_5 (relu)            | (None, 4096)        | 0                    |
| dropout (Dropout)              | (None, 4096)        | 0                    |
| dense_1 (Dense)                | (None, 4096)        | 16,781,312           |
| activation_6 (relu)            | (None, 4096)        | 0                    |
| dropout_1 (Dropout)            | (None, 4096)        | 0                    |
| dense_2 (Dense)                | (None, 1000)        | 4,097,000            |
| activation_7 (relu)            | (None, 1000)        | 0                    |
| dropout_2 (Dropout)            | (None, 1000)        | 0                    |
| dense_3 (Dense)                | (None, 2)           | 2,002                |
| activation_8 (softmax)         | (None, 2)           | 0                    |
| Total trainable parameters     |                     | 28,039,482           |
